# Supplementary material for: The Putative C2H2 Transcription Factor VadH Governs Development, Osmotic Stress Response, and Sterigmatocystin Production in Aspergillus nidulans
Source: MDPI journal article supplement (doi:10.3390/cells11243998), 2022-12-10
Supplement: s1 [file s1]

**Table S1.** *Aspergillus* strains used in this study.

| Strains              | Relevant genotype                                                                                                          | References        |
|----------------------|----------------------------------------------------------------------------------------------------------------------------|-------------------|
| FGSC4                | <i>A. nidulans</i> wild type, <i>veA</i> <sup>+</sup>                                                                      | FGSC <sup>a</sup> |
| RJMP1.59             | <i>pyrG89; pyroA4; veA</i> <sup>+</sup>                                                                                    | [21]              |
| TNJ36                | <i>pyrG89; AfupyG</i> <sup>+</sup> ; <i>pyroA4; veA</i> <sup>+</sup>                                                       | [22]              |
| $\Delta$ <i>vosA</i> | <i>pyrG89; pyroA4; \Delta vosA::AfupyG</i> <sup>+</sup> ; <i>veA</i> <sup>+</sup>                                          | [13]              |
| $\Delta$ <i>velB</i> | <i>pyrG89; pyroA4; \Delta velB::AfupyG</i> <sup>+</sup> ; <i>veA</i> <sup>+</sup>                                          | [13]              |
| $\Delta$ <i>vadH</i> | <i>pyrG89; pyroA4; \Delta vadH::AfupyG</i> <sup>+</sup> ; <i>veA</i> <sup>+</sup>                                          | This study        |
| C' <i>vadH</i>       | <i>pyrG89; pyroA::vadH(p)::vadH::FLAG3x::pyroAb;</i><br><i>\Delta vadH::AfupyrG</i> <sup>+</sup> ; <i>veA</i> <sup>+</sup> | This study        |
| OE <i>vadH</i>       | <i>pyrG89; AfupyrG</i> <sup>+</sup> ; <i>pyroA::nii(p)::vadH::FLAG::pyroA; veA</i> <sup>+</sup>                            | This study        |

<sup>a</sup> Fungal Genetic Stock Center

**Table S2.** Primers used in this study.

| Name      | Sequence (5'-3') <sup>a</sup>                               | Purpose                                    |
|-----------|-------------------------------------------------------------|--------------------------------------------|
| OXL-1     | AAACGGTGGATGCTCAGTGGTCG                                     | 5' flanking region of vadH                 |
| OXL-2     | <i>GCITTTGGCCTGTATCATGACTTCAGATGATAAAG</i><br>GCGGACCCTGCGT | 5' vadH with AfupyrG tail                  |
| OXL-3     | <i>ATCGACCGAACCTAGGTAGGGTAGTTTCCCAGTT</i><br>CGTGCGTTGTCTG  | 3' vadH with AfupyrG tail                  |
| OXL-4     | TCATTGTTACTACTCGGCCTCGG                                     | 3' flanking region of vadH                 |
| OXL-5     | CCGCATCGAGGTACAGCAAAGGT                                     | 5' nested of vadH                          |
| OXL-6     | TACATCTCACGAAGCACACTG                                       | 3' nested of vadH                          |
| OXL-7     | GCCATGCCGTTGGTGCTGTTGCT                                     | verification of vadH ORF                   |
| OXL-8     | ACGCCCCCTTGATGCCCTTGTTAC                                    | verification of vadH ORF                   |
| OXL-9     | CTGGTGTCTCCCCTGAACTTTGT                                     | verification of 5' flanking region         |
| OXL-10    | TTGCTGTTGCCAGGTGAGGGTAT                                     | verification of 5' flanking region         |
| OXL-11    | <b>GATAAGCAAAGTGGACTGATAGC</b>                              | verification of 3' flanking region         |
| OXL-12    | <b>AGTCCTTTAGGCAGCAGTGATAG</b>                              | verification of 3' flanking region         |
| OXL-15    | <b>GGGGTACCCAGTCAAGCGACAACCTCTACTC</b>                      | vadH complement <i>Kpn</i> I-pHS13         |
| OXL-16    | <b>CCCAAGCTTCACTGAGTGACAAGCTCTCACAC</b>                     | vadH complement <i>Hind</i> III-pHS13      |
| OXL-31    | <b>CGGAATTCATGGAGACCGCAGAGCCTGTATC</b>                      | vadH overexpression <i>Eco</i> R I –pHS11  |
| OXL-32    | <b>CCCAAGCTTCTCGTCACCGCGCTTCTCAATGA</b>                     | vadH overexpression <i>Hind</i> III –pHS11 |
| OHS-694   | GCTGAAGTCATGATACAGGCCAAA                                    | 5' AfupyrG marker                          |
| OHS-695   | ATCGTCGGGAGGTATTGTCTGTCAC                                   | 3' AfupyrG marker                          |
| VadH-QF   | CAACATCACAATCACCATCACC                                      | qRT-PCR for VadH                           |
| VadH-QR   | TCATGAGCAGATACTCCGTTAC                                      | qRT-PCR for VadH                           |
| Actin-QF  | GGCAACATCGTTATGTCTGG                                        | qRT-PCR for actin                          |
| Actin-QR  | CCGATCCAGACGGAGTATTT                                        | qRT-PCR for actin                          |
| AN9219-QF | GTCGCAATGTGTCTTCGTAAAC                                      | qRT-PCR for AN9219                         |
| AN9219-QR | CACCGAGAACTTCATTTTGTGT                                      | qRT-PCR for AN9219                         |
| AN7030-QF | GTCATCAAGGCTCTCTACGATT                                      | qRT-PCR for AN7030                         |
| AN7030-QR | CTGATAACGTGGAAGAAATCGC                                      | qRT-PCR for AN7030                         |
| AN1443-QF | CTACAAGTCGGCTTCACCTATG                                      | qRT-PCR for AN1443                         |
| AN1443-QR | GGAACATCCTGTGTCTTAGGAG                                      | qRT-PCR for AN1443                         |
| AN1951-QF | CCATCCCACCTCCAAACTT                                         | qRT-PCR for AN1951                         |
| AN1951-QR | TCATCGCTTATCCCCCAAAG                                        | qRT-PCR for AN1951                         |
| AN4190-QF | CATCGAGACCATCTACCAGAC                                       | qRT-PCR for AN4190                         |
| AN4190-QR | GATAGTGACGGTCGAGTAAGTG                                      | qRT-PCR for AN4190                         |
| AN9473-QF | AATGGTTCCTACGAATTTGCTG                                      | qRT-PCR for AN9473                         |
| AN9473-QR | ATAACACTGAATGTAAAGCGGC                                      | qRT-PCR for AN9473                         |
| AN6273-QF | TCTTTCCTACGACACCAAGTAC                                      | qRT-PCR for AN6273                         |
| AN6273-QR | GAGGTGTAAGTGATCTGGTAGC                                      | qRT-PCR for AN6273                         |
| AN0554-QF | GTCACCTCCGACATGAAGATTG                                      | qRT-PCR for AN0554                         |
| AN0554-QR | CCTGGTACGAGATCATGTTGTA                                      | qRT-PCR for AN0554                         |
| AN1941-QF | AACAACATGGGTATTTTGGCTC                                      | qRT-PCR for AN1941                         |
| AN1941-QR | GCCATGTTAGATTGTGTTCTGG                                      | qRT-PCR for AN1941                         |

|            |                         |                     |
|------------|-------------------------|---------------------|
| AN10218-QF | TTGCCTACGGTATCAATATGCA  | qRT-PCR for AN10218 |
| AN10218-QR | CTCGTTGATTTGCCATCTGTAC  | qRT-PCR for AN10218 |
| AN8043-QF  | GATACTGTTATACCGCACCTCA  | qRT-PCR for AN8043  |
| AN8043-QR  | TAATCTTGTGCACATTGCTGAC  | qRT-PCR for AN8043  |
| AN10694-QF | GGGGAAATGCAGATTATTGTCTG | qRT-PCR for AN10694 |
| AN10694-QR | GCGAATTTTCAGACTCCCATTT  | qRT-PCR for AN10694 |
| AN0773-QF  | TCACGCGAATAATCCTTGTTTC  | qRT-PCR for AN0773  |
| AN0773-QR  | TTTCTTGATGTTTGCCCATAGC  | qRT-PCR for AN0773  |
| AN0493-QF  | TGGACCATTACTTCCCTTAAGC  | qRT-PCR for AN0493  |
| AN0493-QR  | TAGGTACAGTCGGTAGAGTCG   | qRT-PCR for AN0493  |
| AN3804-QF  | TATCATTGACGGAAGGTCGTT   | qRT-PCR for AN3804  |
| AN3804-QR  | GAAGTAGATGTGGACTCAGTGG  | qRT-PCR for AN3804  |
| AN8438-QF  | CATTTGCGAGAGACGTTTACAC  | qRT-PCR for AN8438  |
| AN8438-QR  | CGAGCAAATAAGAAGCCGTATC  | qRT-PCR for AN8438  |
| AN1460-QF  | GTTTTTGAGCAGAGTGGAGATC  | qRT-PCR for AN1460  |
| AN1460-QR  | ACTGCACAACTTTTTGATCCAG  | qRT-PCR for AN1460  |
| AN10326-QF | GTCTTGATGGCGATGTTCTTAC  | qRT-PCR for AN10326 |
| AN10326-QR | GGACAATTCATTGGCGATATCC  | qRT-PCR for AN10326 |
| AN2924-QF  | GTTCGAGGCTGCTACTACTATC  | qRT-PCR for AN2924  |
| AN2924-QR  | GAATCATATAGGATTGCGGCAC  | qRT-PCR for AN2924  |
| AN10003-QF | CGTACAGACAGCAAATCTGAAG  | qRT-PCR for AN10003 |
| AN10003-QR | GATCGAAAATTGTCTCCCCATG  | qRT-PCR for AN10003 |
| AN2002-QF  | CAGTGCTCTCTTTAGCTATGGT  | qRT-PCR for AN2002  |
| AN2002-QR  | GATAATCACCATTGCGCAGTAG  | qRT-PCR for AN2002  |
| AN2928-QF  | GTTTCCACGAACATCATTAGCG  | qRT-PCR for AN2928  |
| AN2928-QR  | GAAAGAGAGAAGACCGTGAAGA  | qRT-PCR for AN2928  |
| AN11378-QF | GATCTGTTGTTCGGGATACTGT  | qRT-PCR for AN11378 |
| AN11378-QR | CAACGCACTTATTTCCATAGCA  | qRT-PCR for AN11378 |
| AN3804-QF  | TATCATTGACGGAAGGTCGTT   | qRT-PCR for AN3804  |
| AN3804-QR  | GAAGTAGATGTGGACTCAGTGG  | qRT-PCR for AN3804  |
| AN9168-QF  | TCAAGATGCCTACGGATTATAC  | qRT-PCR for AN9168  |
| AN9168-QR  | GACCGACTCTCTACCATAAA    | qRT-PCR for AN9168  |
| AN11039-QF | GAAAAAGATCCCGGTTACAAGG  | qRT-PCR for AN11039 |
| AN11039-QR | GTTGAACTGGAGGTCAGACTTA  | qRT-PCR for AN11039 |
| AN9443-QF  | CAAGCTTTCAAGATCAAAACGC  | qRT-PCR for AN9443  |
| AN9443-QR  | TATCCTGAGACTGTGCACAAAT  | qRT-PCR for AN9443  |
| AN10385-QF | CTTGATACGTCGTTATTGTCCG  | qRT-PCR for AN10385 |
| AN10385-QR | CTTGTGAAAATGACGACCGTAG  | qRT-PCR for AN10385 |
| AN7836-QF  | AAGACGGATAATTTTGCACAGG  | qRT-PCR for AN7836  |
| AN7836-QR  | TTGGTCCTCATTAGTCTTCCAG  | qRT-PCR for AN7836  |
| AN2242-QF  | CTACTGACTGCAAATTCGTGAG  | qRT-PCR for AN2242  |
| AN2242-QR  | AATGGAGCAGATCGTGGTAATG  | qRT-PCR for AN2242  |

---

<sup>a</sup>Tail sequences are shown in italics. Restriction enzyme sites are in bold

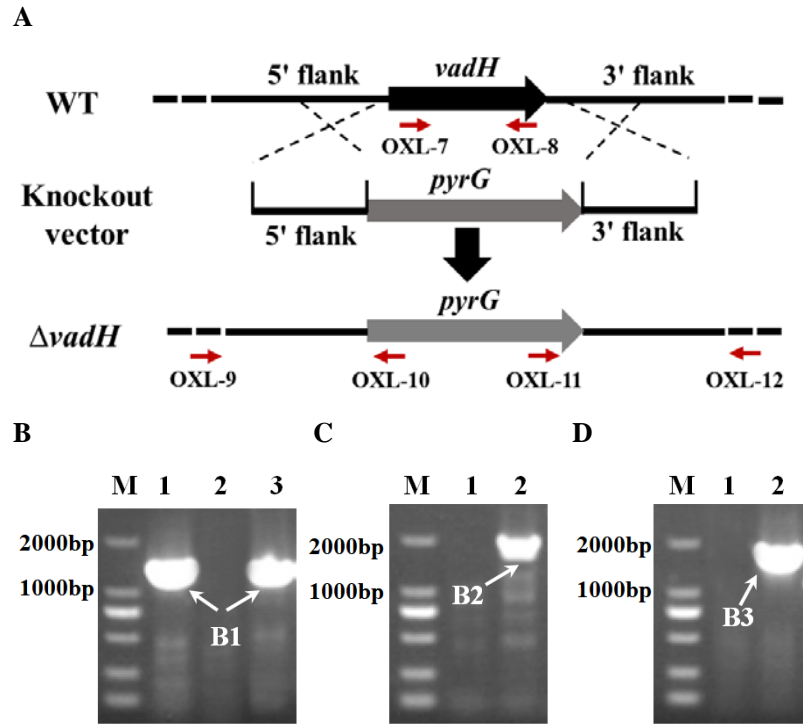

**Figure S1.** Verification of the gene-knockout mutant and complementary strain. (A) The verification strategy of *vadH*. (B) PCR verification results of OXL7 / OXL8. (C) PCR verification results of OXL9 / OXL10; (D) PCR verification results of OXL11 / OXL12. M: DL2000 DNA marker, 1: WT, 2:  $\Delta vadH$ , 3: C' *vadH*. B1: PCR amplification fragment using the primers OXL7 / OXL8; B2: PCR amplification fragment using the primers OXL9 / OXL10; B3: PCR amplification fragment using the primers OXL11 / OXL12.

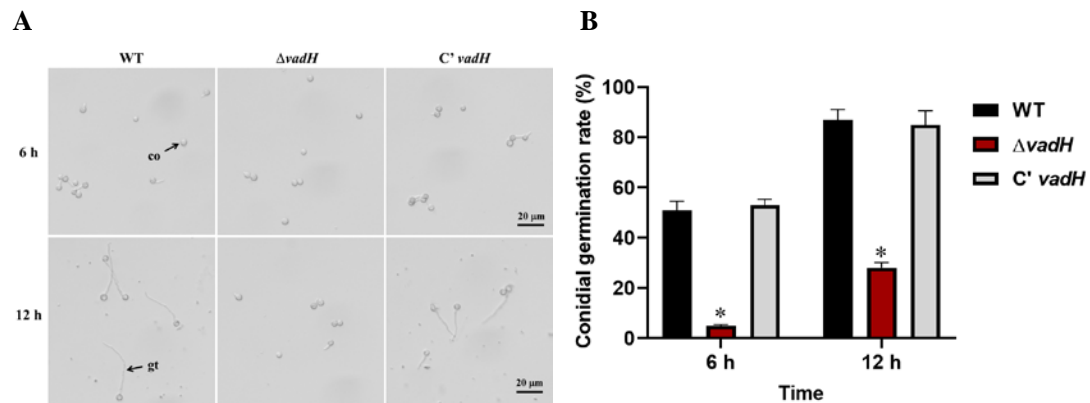

**Figure S2.** Conidial germination of WT,  $\Delta vadH$  and the complemented strain. (A) Conidial germination at 6 and 12 h. co: conidium, gt: germ tube. (B) Statistical analyses of conidial germination rates. The asterisks represent significant level (\*  $p < 0.05$ ).

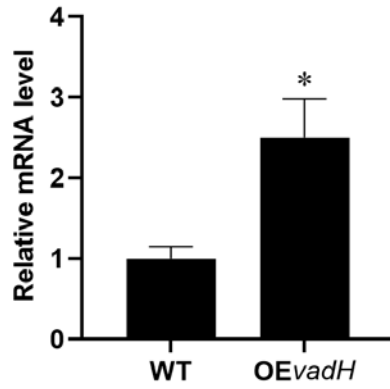

**Figure S3.** Verification of the mRNA level of *vadH* in OE*vadH*.

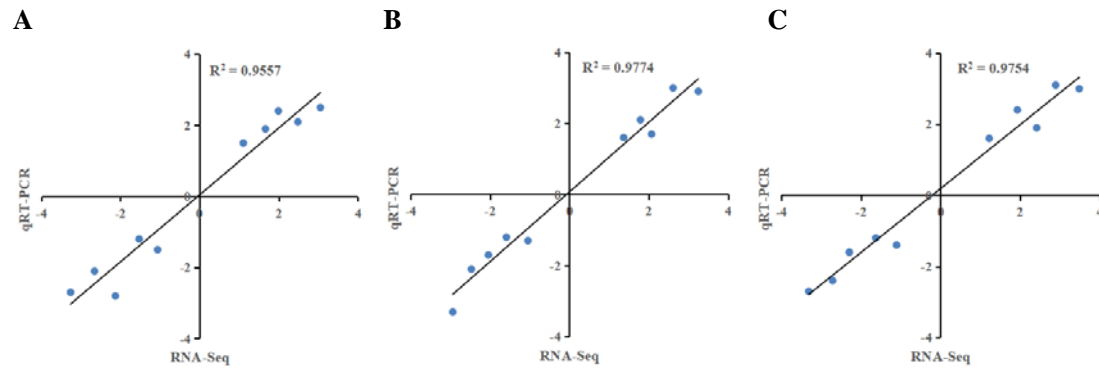

**Figure S4.** The qRT-PCR verification of RNA-Seq data in three stages. Five up-regulated and five downregulated genes were randomly selected and validated. **(A)** The qRT-PCR verification of RNA-Seq data in the vegetative growth stage. The selected DEGs for vegetative grow stage were as follows: AN9219 ( $\log_2$ Fold change in RNA-Seq: 3.05), AN7030 (2.48), AN1443 (1.99), AN1951 (1.66), AN4190 (1.10), AN9473 (-1.06), AN6273 (-1.53), AN0554 (-2.13), AN1941 (-2.66) and AN10218 (-3.26). **(B)** The qRT-PCR verification of RNA-Seq data in the asexual development stage. The selected DEGs for asexual development stage were as follows: AN8043 (3.25), AN10694 (2.61), AN0773 (2.07), AN0493 (1.79), AN3804 (1.37), AN8438 (-1.04), AN1460 (-1.59), AN10326 (-2.04), AN2924 (-2.47) and AN10003 (-2.94). **(C)** The qRT-PCR verification of RNA-Seq data in the sexual development stage. The selected DEGs for sexual development stage were as follows: AN2002 (3.48), AN2928 (2.89), AN11378 (2.42), AN3804 (1.93), AN9168 (1.22), AN11039 (-1.11), AN9443- (-1.63), AN10385 (-2.29), AN7836 (-2.71) and AN2242 (-3.31).
